# Supplementary material for: Silk-Elastin-like Polymers for Acute Intraparenchymal Treatment of the Traumatically Injured Spinal Cord: A First Systematic Experimental Approach
Source: MDPI journal article supplement (doi:10.3390/pharmaceutics14122713), 2022-12-03
Supplement: s1 [file s1]

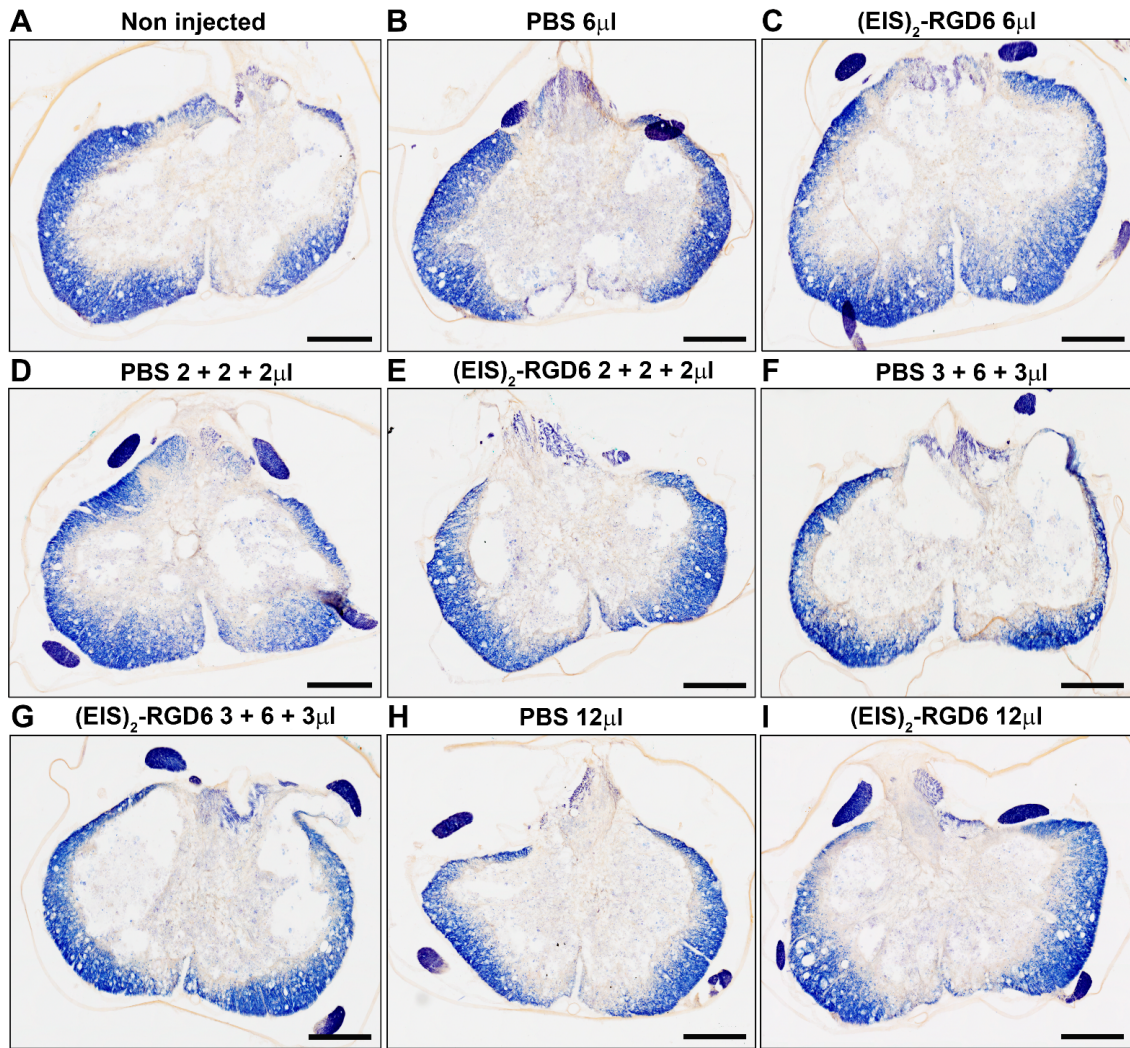

**Figure S1. Representative images from eriochrome cyanine stained sections.** Representative images of Ecy stained spinal cord sections corresponding to the lesion epicentre, used to carry out the densitometrical analysis of myelin preservation in experiment (EIS)<sub>2</sub>-RGD6 I: (A) Non-injected group; (B) PBS 6 µL group; (C) (EIS)<sub>2</sub>-RGD6 6 µL group; (D) PBS 2 + 2 + 2 µL group; (E) (EIS)<sub>2</sub>-RGD6 2 + 2 + 2 µL group; (F) PBS 3 + 6 + 3 µL group; (G) (EIS)<sub>2</sub>-RGD6 3 + 6 + 3 µL group; (H) PBS 12 µL group; and (I) (EIS)<sub>2</sub>-RGD6 12 µL group. Scale bars, 500 µm. Please note that data obtained from the densitometric analysis of myelin preservation in these sections can be found in Figure 7.
