# Supplementary material for: Silk-Elastin-like Polymers for Acute Intraparenchymal Treatment of the Traumatically Injured Spinal Cord: A First Systematic Experimental Approach
Source: MDPI journal article supplement (doi:10.3390/pharmaceutics14122713), 2022-12-03
Supplement: s1 [file s1]

#### A. Non injected (NI) group vs. groups injected with PBS:

##### Paw positions

|                 | 1 dpi | 5 dpi | 7 dpi | 14 dpi      | 21 dpi      | 28 dpi     | 35 dpi      | 42 dpi      |
|-----------------|-------|-------|-------|-------------|-------------|------------|-------------|-------------|
| NI              | 0 ± 0 | 0 ± 0 | 0 ± 0 | 1.25 ± 0.63 | 2.25 ± 0.85 | 2.5 ± 0.87 | 2.5 ± 0.65  | 2.25 ± 0.75 |
| PBS 6µl         | 0 ± 0 | 0 ± 0 | 0 ± 0 | 0.5 ± 0.29  | 1.5 ± 0.29  | 1.5 ± 0.5  | 2 ± 0.41    | 2.75 ± 0.35 |
| PBS 2 + 2 + 2µl | 0 ± 0 | 0 ± 0 | 0 ± 0 | 0.4 ± 0.4   | 0.8 ± 0.37  | 1.6 ± 0.68 | 1.4 ± 0.68  | 1.6 ± 0.6   |
| PBS 3 + 6 + 3µl | 0 ± 0 | 0 ± 0 | 0 ± 0 | 0.2 ± 0.2   | 1 ± 0.32    | 1 ± 0.32   | 1.2 ± 0.2   | 1.6 ± 0.24  |
| PBS 12µl        | 0 ± 0 | 0 ± 0 | 0 ± 0 | 0 ± 0       | 0.75 ± 0.75 | 0.5 ± 0.5  | 0.75 ± 0.48 | 0.5 ± 0.5   |

##### Toe clearance

|                 | 1 dpi | 5 dpi | 7 dpi | 14 dpi     | 21 dpi       | 28 dpi        | 35 dpi         | 42 dpi        |
|-----------------|-------|-------|-------|------------|--------------|---------------|----------------|---------------|
| NI              | 0 ± 0 | 0 ± 0 | 0 ± 0 | 2 ± 0.71   | 4.25 ± 1.18  | 4.5 ± 0.5     | 4.25 ± 0.48    | 4.25 ± 0.48   |
| PBS 6µl         | 0 ± 0 | 0 ± 0 | 0 ± 0 | 0.5 ± 0.5  | 2.25* ± 0.63 | 2.25* ± 0.63  | 3 ± 0.41       | 3 ± 0.41      |
| PBS 2 + 2 + 2µl | 0 ± 0 | 0 ± 0 | 0 ± 0 | 0.8 ± 0.58 | 1.2** ± 0.8  | 1.8** ± 0.66  | 2.4 ± 0.4      | 3.2 ± 0.8     |
| PBS 3 + 6 + 3µl | 0 ± 0 | 0 ± 0 | 0 ± 0 | 0.2* ± 0.2 | 0.6*** ± 0.4 | 1.4*** ± 0.24 | 1.6*** ± 0.24  | 1.8*** ± 0.37 |
| PBS 12µl        | 0 ± 0 | 0 ± 0 | 0 ± 0 | 0* ± 0     | 0.5*** ± 0.5 | 0.5*** ± 0.5  | 0.75*** ± 0.47 | 0.5*** ± 0.5  |

##### Stepping

|                 | 1 dpi | 5 dpi | 7 dpi       | 14 dpi        | 21 dpi        | 28 dpi | 35 dpi      | 42 dpi |
|-----------------|-------|-------|-------------|---------------|---------------|--------|-------------|--------|
| NI              | 0 ± 0 | 0 ± 0 | 2 ± 0.7     | 6 ± 0         | 6 ± 0         | 6 ± 0  | 6 ± 0       | 6 ± 0  |
| PBS 6µl         | 0 ± 0 | 0 ± 0 | 0*** ± 0    | 4.5** ± 0.96  | 6 ± 0         | 6 ± 0  | 6 ± 0       | 6 ± 0  |
| PBS 2 + 2 + 2µl | 0 ± 0 | 0 ± 0 | 0.5* ± 0.34 | 4*** ± 2      | 5.6 ± 0.4     | 6 ± 0  | 6 ± 0       | 6 ± 0  |
| PBS 3 + 6 + 3µl | 0 ± 0 | 0 ± 0 | 0*** ± 0    | 4.8* ± 0.73   | 6 ± 0         | 6 ± 0  | 6 ± 0       | 6 ± 0  |
| PBS 12µl        | 0 ± 0 | 0 ± 0 | 0 ± 0       | 2.75** ± 1.25 | 2.75** ± 1.25 | 5 ± 1  | 5.75 ± 0.25 | 5 ± 1  |

##### Tail position

|                 | 1 dpi | 5 dpi | 7 dpi | 14 dpi      | 21 dpi      | 28 dpi      | 35 dpi      | 42 dpi      |
|-----------------|-------|-------|-------|-------------|-------------|-------------|-------------|-------------|
| NI              | 0 ± 0 | 0 ± 0 | 0 ± 0 | 0.25 ± 0.25 | 0.75 ± 0.25 | 1 ± 0.41    | 0.75 ± 0.25 | 0.75 ± 0.25 |
| PBS 6µl         | 0 ± 0 | 0 ± 0 | 0 ± 0 | 0.5 ± 0.29  | 1 ± 0.41    | 1.25 ± 0.48 | 1.25 ± 0.25 | 1.25 ± 0.25 |
| PBS 2 + 2 + 2µl | 0 ± 0 | 0 ± 0 | 0 ± 0 | 0.6 ± 0.4   | 0.8 ± 0.2   | 1 ± 0.32    | 1.2 ± 0.37  | 1.2 ± 0.2   |
| PBS 3 + 6 + 3µl | 0 ± 0 | 0 ± 0 | 0 ± 0 | 0 ± 0       | 0.6 ± 0.24  | 0.6 ± 0.24  | 0.8 ± 0.37  | 0.8 ± 0.37  |
| PBS 12µl        | 0 ± 0 | 0 ± 0 | 0 ± 0 | 0 ± 0       | 0* ± 0      | 0** ± 0     | 0.25 ± 0.25 | 0.75 ± 0.25 |

##### Coordination

|                 | 1 dpi | 5 dpi | 7 dpi | 14 dpi      | 21 dpi      | 28 dpi        | 35 dpi       | 42 dpi        |
|-----------------|-------|-------|-------|-------------|-------------|---------------|--------------|---------------|
| NI              | 0 ± 0 | 0 ± 0 | 0 ± 0 | 0.75 ± 0.48 | 1.75 ± 0.48 | 1.75 ± 0.48   | 2 ± 0.4      | 2.25 ± 0.48   |
| PBS 6µl         | 0 ± 0 | 0 ± 0 | 0 ± 0 | 0 ± 0       | 0*** ± 0    | 0.75 ± 0.25   | 1.5 ± 0.29   | 2 ± 0.41      |
| PBS 2 + 2 + 2µl | 0 ± 0 | 0 ± 0 | 0 ± 0 | 0 ± 0       | 0*** ± 0    | 0.2*** ± 0.2  | 0.8** ± 0.2  | 1.4 ± 0.24    |
| PBS 3 + 6 + 3µl | 0 ± 0 | 0 ± 0 | 0 ± 0 | 0 ± 0       | 0*** ± 0    | 0.2*** ± 0.2  | 0.8* ± 0.2   | 1** ± 0.32    |
| PBS 12µl        | 0 ± 0 | 0 ± 0 | 0 ± 0 | 0 ± 0       | 0*** ± 0    | 0.25** ± 0.25 | 0.75* ± 0.25 | 0.75** ± 0.25 |

B. PBS 6μl vs. (EIS)<sub>2</sub>-RGD6 6μl:

Paw positions

|                              | 1 dpi | 5 dpi | 7 dpi | 14 dpi     | 21 dpi     | 28 dpi      | 35 dpi      | 42 dpi      |
|------------------------------|-------|-------|-------|------------|------------|-------------|-------------|-------------|
| PBS 6μl                      | 0 ± 0 | 0 ± 0 | 0 ± 0 | 0.5 ± 0.29 | 1.5 ± 0.29 | 1.5 ± 0.5   | 2 ± 0.41    | 2.75 ± 0.35 |
| (EIS) <sub>2</sub> -RGD6 6μl | 0 ± 0 | 0 ± 0 | 0 ± 0 | 0.75 ± 0.5 | 1.5 ± 0.5  | 2.33 ± 0.33 | 2.67 ± 0.33 | 2.33 ± 0.66 |

Toe clearance

|                              | 1 dpi | 5 dpi | 7 dpi | 14 dpi      | 21 dpi      | 28 dpi      | 35 dpi      | 42 dpi   |
|------------------------------|-------|-------|-------|-------------|-------------|-------------|-------------|----------|
| PBS 6μl                      | 0 ± 0 | 0 ± 0 | 0 ± 0 | 0.5 ± 0.5   | 2.25 ± 0.63 | 2.25 ± 0.63 | 3 ± 0.41    | 3 ± 0.41 |
| (EIS) <sub>2</sub> -RGD6 6μl | 0 ± 0 | 0 ± 0 | 0 ± 0 | 1.25 ± 0.48 | 2.5 ± 0.29  | 3.33 ± 0.67 | 3.67 ± 0.33 | 4 ± 0    |

Stepping

|                              | 1 dpi | 5 dpi | 7 dpi | 14 dpi        | 21 dpi | 28 dpi | 35 dpi | 42 dpi |
|------------------------------|-------|-------|-------|---------------|--------|--------|--------|--------|
| PBS 6μl                      | 0 ± 0 | 0 ± 0 | 0 ± 0 | 4.5 ± 0.96    | 6 ± 0  | 6 ± 0  | 6 ± 0  | 6 ± 0  |
| (EIS) <sub>2</sub> -RGD6 6μl | 0 ± 0 | 0 ± 0 | 0 ± 0 | 5.75** ± 0.25 | 6 ± 0  | 6 ± 0  | 6 ± 0  | 6 ± 0  |

Tail position

|                              | 1 dpi | 5 dpi | 7 dpi | 14 dpi      | 21 dpi   | 28 dpi      | 35 dpi      | 42 dpi      |
|------------------------------|-------|-------|-------|-------------|----------|-------------|-------------|-------------|
| PBS 6μl                      | 0 ± 0 | 0 ± 0 | 0 ± 0 | 0.5 ± 0.29  | 1 ± 0.41 | 1.25 ± 0.48 | 1.25 ± 0.25 | 1.25 ± 0.25 |
| (EIS) <sub>2</sub> -RGD6 6μl | 0 ± 0 | 0 ± 0 | 0 ± 0 | 0.75 ± 0.25 | 1 ± 0    | 1 ± 0       | 1 ± 0       | 1.33 ± 0.33 |

Coordination

|                              | 1 dpi | 5 dpi | 7 dpi | 14 dpi | 21 dpi     | 28 dpi      | 35 dpi     | 42 dpi   |
|------------------------------|-------|-------|-------|--------|------------|-------------|------------|----------|
| PBS 6μl                      | 0 ± 0 | 0 ± 0 | 0 ± 0 | 0 ± 0  | 0 ± 0      | 0.75 ± 0.25 | 1.5 ± 0.29 | 2 ± 0.41 |
| (EIS) <sub>2</sub> -RGD6 6μl | 0 ± 0 | 0 ± 0 | 0 ± 0 | 0 ± 0  | 0.5 ± 0.29 | 1.33 ± 0.33 | 2 ± 0.58   | 2 ± 0.58 |

C. PBS 2 + 2 + 2μl vs. (EIS)<sub>2</sub>-RGD6 2 + 2 + 2μl:

Paw positions

|                                      | 1 dpi | 5 dpi | 7 dpi | 14 dpi    | 21 dpi     | 28 dpi      | 35 dpi      | 42 dpi    |
|--------------------------------------|-------|-------|-------|-----------|------------|-------------|-------------|-----------|
| PBS 2 + 2 + 2μl                      | 0 ± 0 | 0 ± 0 | 0 ± 0 | 0.4 ± 0.4 | 0.8 ± 0.37 | 1.6 ± 0.68  | 1.4 ± 0.68  | 1.6 ± 0.6 |
| (EIS) <sub>2</sub> -RGD6 2 + 2 + 2μl | 0 ± 0 | 0 ± 0 | 0 ± 0 | 1 ± 0     | 1 ± 0      | 1.75 ± 0.25 | 1.75 ± 0.25 | 2 ± 0     |

Toe clearance

|                                      | 1 dpi | 5 dpi | 7 dpi | 14 dpi      | 21 dpi     | 28 dpi     | 35 dpi     | 42 dpi     |
|--------------------------------------|-------|-------|-------|-------------|------------|------------|------------|------------|
| PBS 2 + 2 + 2μl                      | 0 ± 0 | 0 ± 0 | 0 ± 0 | 0.8 ± 0.58  | 1.2 ± 0.8  | 1.8 ± 0.66 | 2.4 ± 0.4  | 3.2 ± 0.8  |
| (EIS) <sub>2</sub> -RGD6 2 + 2 + 2μl | 0 ± 0 | 0 ± 0 | 0 ± 0 | 1.25 ± 0.48 | 1.5 ± 0.29 | 2 ± 0      | 2.5 ± 0.29 | 2.5 ± 0.29 |

Stepping

|                                      | 1 dpi | 5 dpi | 7 dpi      | 14 dpi   | 21 dpi    | 28 dpi | 35 dpi | 42 dpi |
|--------------------------------------|-------|-------|------------|----------|-----------|--------|--------|--------|
| PBS 2 + 2 + 2μl                      | 0 ± 0 | 0 ± 0 | 0.5 ± 0.34 | 4 ± 2    | 5.6 ± 0.4 | 6 ± 0  | 6 ± 0  | 6 ± 0  |
| (EIS) <sub>2</sub> -RGD6 2 + 2 + 2μl | 0 ± 0 | 0 ± 0 | 0 ± 0      | 5 ± 0.58 | 6 ± 0     | 6 ± 0  | 6 ± 0  | 6 ± 0  |

Tail position

|                                      | 1 dpi | 5 dpi | 7 dpi | 14 dpi    | 21 dpi     | 28 dpi      | 35 dpi     | 42 dpi      |
|--------------------------------------|-------|-------|-------|-----------|------------|-------------|------------|-------------|
| PBS 2 + 2 + 2μl                      | 0 ± 0 | 0 ± 0 | 0 ± 0 | 0.6 ± 0.4 | 0.8 ± 0.2  | 1 ± 0.32    | 1.2 ± 0.37 | 1.2 ± 0.2   |
| (EIS) <sub>2</sub> -RGD6 2 + 2 + 2μl | 0 ± 0 | 0 ± 0 | 0 ± 0 | 0 ± 0     | 0.5 ± 0.29 | 0.75 ± 0.25 | 1 ± 0.41   | 1.25 ± 0.25 |

Coordination

|                                      | 1 dpi | 5 dpi | 7 dpi | 14 dpi | 21 dpi      | 28 dpi         | 35 dpi     | 42 dpi     |
|--------------------------------------|-------|-------|-------|--------|-------------|----------------|------------|------------|
| PBS 2 + 2 + 2μl                      | 0 ± 0 | 0 ± 0 | 0 ± 0 | 0 ± 0  | 0 ± 0       | 0.2 ± 0.2      | 0.8 ± 0.2  | 1.4 ± 0.24 |
| (EIS) <sub>2</sub> -RGD6 2 + 2 + 2μl | 0 ± 0 | 0 ± 0 | 0 ± 0 | 0 ± 0  | 0.25 ± 0.25 | 1.25*** ± 0.48 | 1.5 ± 0.29 | 1.5 ± 0.29 |

D. PBS 3 + 6 + 3μl vs. (EIS)<sub>2</sub>-RGD6 3 + 6 + 3μl:

Paw positions

|                                      | 1 dpi | 5 dpi | 7 dpi | 14 dpi       | 21 dpi      | 28 dpi      | 35 dpi      | 42 dpi      |
|--------------------------------------|-------|-------|-------|--------------|-------------|-------------|-------------|-------------|
| PBS 3 + 6 + 3μl                      | 0 ± 0 | 0 ± 0 | 0 ± 0 | 0.2 ± 0.2    | 1 ± 0.32    | 1 ± 0.32    | 1.2 ± 0.2   | 1.6 ± 0.24  |
| (EIS) <sub>2</sub> -RGD6 3 + 6 + 3μl | 0 ± 0 | 0 ± 0 | 0 ± 0 | 1.5** ± 0.64 | 1.25 ± 0.25 | 1.25 ± 0.25 | 1.67 ± 0.67 | 2.33 ± 0.33 |

Toe clearance

|                                      | 1 dpi | 5 dpi | 7 dpi | 14 dpi     | 21 dpi       | 28 dpi      | 35 dpi        | 42 dpi       |
|--------------------------------------|-------|-------|-------|------------|--------------|-------------|---------------|--------------|
| PBS 3 + 6 + 3μl                      | 0 ± 0 | 0 ± 0 | 0 ± 0 | 0.2 ± 0.2  | 0.6 ± 0.4    | 1.4 ± 0.24  | 1.6 ± 0.24    | 1.8 ± 0.37   |
| (EIS) <sub>2</sub> -RGD6 3 + 6 + 3μl | 0 ± 0 | 0 ± 0 | 0 ± 0 | 1.5 ± 0.87 | 2.25* ± 0.85 | 2.75 ± 0.94 | 3.67** ± 0.67 | 3.67* ± 0.33 |

Stepping

|                                      | 1 dpi | 5 dpi | 7 dpi | 14 dpi         | 21 dpi | 28 dpi | 35 dpi | 42 dpi |
|--------------------------------------|-------|-------|-------|----------------|--------|--------|--------|--------|
| PBS 3 + 6 + 3μl                      | 0 ± 0 | 0 ± 0 | 0 ± 0 | 4.8 ± 0.73     | 6 ± 0  | 6 ± 0  | 6 ± 0  | 6 ± 0  |
| (EIS) <sub>2</sub> -RGD6 3 + 6 + 3μl | 0 ± 0 | 0 ± 0 | 0 ± 0 | 5.75*** ± 0.25 | 6 ± 0  | 6 ± 0  | 6 ± 0  | 6 ± 0  |

Tail position

|                                      | 1 dpi | 5 dpi | 7 dpi | 14 dpi     | 21 dpi      | 28 dpi     | 35 dpi      | 42 dpi      |
|--------------------------------------|-------|-------|-------|------------|-------------|------------|-------------|-------------|
| PBS 3 + 6 + 3μl                      | 0 ± 0 | 0 ± 0 | 0 ± 0 | 0 ± 0      | 0.6 ± 0.24  | 0.6 ± 0.24 | 0.8 ± 0.37  | 0.8 ± 0.37  |
| (EIS) <sub>2</sub> -RGD6 3 + 6 + 3μl | 0 ± 0 | 0 ± 0 | 0 ± 0 | 0.5 ± 0.29 | 0.75 ± 0.25 | 1 ± 0.41   | 0.68 ± 0.33 | 0.67 ± 0.33 |

Coordination

|                                      | 1 dpi | 5 dpi | 7 dpi | 14 dpi | 21 dpi     | 28 dpi        | 35 dpi    | 42 dpi   |
|--------------------------------------|-------|-------|-------|--------|------------|---------------|-----------|----------|
| PBS 3 + 6 + 3μl                      | 0 ± 0 | 0 ± 0 | 0 ± 0 | 0 ± 0  | 0 ± 0      | 0.2 ± 0.2     | 0.8 ± 0.2 | 1 ± 0.32 |
| (EIS) <sub>2</sub> -RGD6 3 + 6 + 3μl | 0 ± 0 | 0 ± 0 | 0 ± 0 | 0 ± 0  | 0.5 ± 0.29 | 1.5*** ± 0.28 | 2*** ± 0  | 2*** ± 0 |

E. PBS 12μl vs. (EIS)<sub>2</sub>-RGD6 12μl:

Paw positions

|                               | 1 dpi | 5 dpi | 7 dpi | 14 dpi     | 21 dpi      | 28 dpi      | 35 dpi      | 42 dpi      |
|-------------------------------|-------|-------|-------|------------|-------------|-------------|-------------|-------------|
| PBS 12μl                      | 0 ± 0 | 0 ± 0 | 0 ± 0 | 0 ± 0      | 0.75 ± 0.75 | 0.5 ± 0.5   | 0.75 ± 0.48 | 0.5 ± 0.5   |
| (EIS) <sub>2</sub> -RGD6 12μl | 0 ± 0 | 0 ± 0 | 0 ± 0 | 1.4 ± 0.63 | 2 ± 0.89    | 1.75 ± 0.87 | 1.67 ± 0.96 | 1.67 ± 0.96 |

Toe clearance

|                               | 1 dpi | 5 dpi | 7 dpi | 14 dpi     | 21 dpi    | 28 dpi     | 35 dpi       | 42 dpi       |
|-------------------------------|-------|-------|-------|------------|-----------|------------|--------------|--------------|
| PBS 12μl                      | 0 ± 0 | 0 ± 0 | 0 ± 0 | 0 ± 0      | 0.5 ± 0.5 | 0.5 ± 0.5  | 0.75 ± 0.47  | 0.5 ± 0.5    |
| (EIS) <sub>2</sub> -RGD6 12μl | 0 ± 0 | 0 ± 0 | 0 ± 0 | 1.2 ± 0.54 | 1.8 ± 0.8 | 3*** ± 1.5 | 2.67* ± 1.54 | 2.33* ± 1.35 |

Stepping

|                               | 1 dpi | 5 dpi | 7 dpi | 14 dpi      | 21 dpi      | 28 dpi | 35 dpi      | 42 dpi |
|-------------------------------|-------|-------|-------|-------------|-------------|--------|-------------|--------|
| PBS 12μl                      | 0 ± 0 | 0 ± 0 | 0 ± 0 | 2.75 ± 1.25 | 2.75 ± 1.25 | 5 ± 1  | 5.75 ± 0.25 | 5 ± 1  |
| (EIS) <sub>2</sub> -RGD6 12μl | 0 ± 0 | 0 ± 0 | 0 ± 0 | 4.8 ± 0.58  | 6** ± 0     | 6 ± 0  | 6 ± 0       | 6 ± 0  |

Tail position

|                               | 1 dpi | 5 dpi | 7 dpi | 14 dpi | 21 dpi        | 28 dpi     | 35 dpi         | 42 dpi      |
|-------------------------------|-------|-------|-------|--------|---------------|------------|----------------|-------------|
| PBS 12μl                      | 0 ± 0 | 0 ± 0 | 0 ± 0 | 0 ± 0  | 0 ± 0         | 0 ± 0      | 0.25 ± 0.25    | 0.75 ± 0.25 |
| (EIS) <sub>2</sub> -RGD6 12μl | 0 ± 0 | 0 ± 0 | 0 ± 0 | 0 ± 0  | 0.8*** ± 0.36 | 1*** ± 0.5 | 1.33*** ± 0.77 | 1.33 ± 0.77 |

Coordination

|                               | 1 dpi | 5 dpi | 7 dpi | 14 dpi     | 21 dpi       | 28 dpi       | 35 dpi      | 42 dpi      |
|-------------------------------|-------|-------|-------|------------|--------------|--------------|-------------|-------------|
| PBS 12μl                      | 0 ± 0 | 0 ± 0 | 0 ± 0 | 0 ± 0      | 0 ± 0        | 0.25 ± 0.25  | 0.75 ± 0.25 | 0.75 ± 0.25 |
| (EIS) <sub>2</sub> -RGD6 12μl | 0 ± 0 | 0 ± 0 | 0 ± 0 | 0.2 ± 0.09 | 0.8** ± 0.36 | 0.75 ± 0.375 | 1 ± 0.58    | 1 ± 0.58    |

F. Non injected (NI) group vs. groups injected with (EIS)<sub>2</sub>-RGD6:

Paw positions

|                                      | 1 dpi | 5 dpi | 7 dpi | 14 dpi      | 21 dpi      | 28 dpi      | 35 dpi      | 42 dpi      |
|--------------------------------------|-------|-------|-------|-------------|-------------|-------------|-------------|-------------|
| NI                                   | 0 ± 0 | 0 ± 0 | 0 ± 0 | 1.25 ± 0.63 | 2.25 ± 0.85 | 2.5 ± 0.87  | 2.5 ± 0.65  | 2.25 ± 0.75 |
| (EIS) <sub>2</sub> -RGD6 6μl         | 0 ± 0 | 0 ± 0 | 0 ± 0 | 0.75 ± 0.5  | 1.5 ± 0.5   | 2.33 ± 0.33 | 2.67 ± 0.33 | 2.33 ± 0.66 |
| (EIS) <sub>2</sub> -RGD6 2 + 2 + 2μl | 0 ± 0 | 0 ± 0 | 0 ± 0 | 1 ± 0       | 1 ± 0       | 1.75 ± 0.25 | 1.75 ± 0.25 | 2 ± 0       |
| (EIS) <sub>2</sub> -RGD6 3 + 6 + 3μl | 0 ± 0 | 0 ± 0 | 0 ± 0 | 1.5 ± 0.64  | 1.25 ± 0.25 | 1.25 ± 0.25 | 1.67 ± 0.67 | 2.33 ± 0.33 |
| (EIS) <sub>2</sub> -RGD6 12μl        | 0 ± 0 | 0 ± 0 | 0 ± 0 | 1.4 ± 0.63  | 2 ± 0.89    | 1.75 ± 0.87 | 1.67 ± 0.96 | 1.67 ± 0.96 |

Toe clearance

|                                      | 1 dpi | 5 dpi | 7 dpi | 14 dpi      | 21 dpi        | 28 dpi      | 35 dpi      | 42 dpi       |
|--------------------------------------|-------|-------|-------|-------------|---------------|-------------|-------------|--------------|
| NI                                   | 0 ± 0 | 0 ± 0 | 0 ± 0 | 2 ± 0.71    | 4.25 ± 1.18   | 4.5 ± 0.5   | 4.25 ± 0.48 | 4.25 ± 0.48  |
| (EIS) <sub>2</sub> -RGD6 6μl         | 0 ± 0 | 0 ± 0 | 0 ± 0 | 1.25 ± 0.48 | 2.5 ± 0.29    | 3.33 ± 0.67 | 3.67 ± 0.33 | 4 ± 0        |
| (EIS) <sub>2</sub> -RGD6 2 + 2 + 2μl | 0 ± 0 | 0 ± 0 | 0 ± 0 | 1.25 ± 0.48 | 1.5*** ± 0.29 | 2** ± 0     | 2.5 ± 0.29  | 2.5 ± 0.29   |
| (EIS) <sub>2</sub> -RGD6 3 + 6 + 3μl | 0 ± 0 | 0 ± 0 | 0 ± 0 | 1.5 ± 0.87  | 2.25 ± 0.85   | 2.75 ± 0.94 | 3.67 ± 0.67 | 3.67 ± 0.33  |
| (EIS) <sub>2</sub> -RGD6 12μl        | 0 ± 0 | 0 ± 0 | 0 ± 0 | 1.2 ± 0.54  | 1.8** ± 0.8   | 3 ± 1.5     | 2.67 ± 1.54 | 2.33* ± 1.35 |

Stepping

|                                      | 1 dpi | 5 dpi | 7 dpi    | 14 dpi       | 21 dpi | 28 dpi | 35 dpi | 42 dpi |
|--------------------------------------|-------|-------|----------|--------------|--------|--------|--------|--------|
| NI                                   | 0 ± 0 | 0 ± 0 | 2 ± 0.7  | 6 ± 0        | 6 ± 0  | 6 ± 0  | 6 ± 0  | 6 ± 0  |
| (EIS) <sub>2</sub> -RGD6 6μl         | 0 ± 0 | 0 ± 0 | 0*** ± 0 | 5.75 ± 0.25  | 6 ± 0  | 6 ± 0  | 6 ± 0  | 6 ± 0  |
| (EIS) <sub>2</sub> -RGD6 2 + 2 + 2μl | 0 ± 0 | 0 ± 0 | 0*** ± 0 | 5* ± 0.58    | 6 ± 0  | 6 ± 0  | 6 ± 0  | 6 ± 0  |
| (EIS) <sub>2</sub> -RGD6 3 + 6 + 3μl | 0 ± 0 | 0 ± 0 | 0*** ± 0 | 5.75 ± 0.25  | 6 ± 0  | 6 ± 0  | 6 ± 0  | 6 ± 0  |
| (EIS) <sub>2</sub> -RGD6 12μl        | 0 ± 0 | 0 ± 0 | 0*** ± 0 | 4.8** ± 0.58 | 6 ± 0  | 6 ± 0  | 6 ± 0  | 6 ± 0  |

Tail position

|                                      | 1 dpi | 5 dpi | 7 dpi | 14 dpi      | 21 dpi      | 28 dpi      | 35 dpi      | 42 dpi      |
|--------------------------------------|-------|-------|-------|-------------|-------------|-------------|-------------|-------------|
| NI                                   | 0 ± 0 | 0 ± 0 | 0 ± 0 | 0.25 ± 0.25 | 0.75 ± 0.25 | 1 ± 0.41    | 0.75 ± 0.25 | 0.75 ± 0.25 |
| (EIS) <sub>2</sub> -RGD6 6μl         | 0 ± 0 | 0 ± 0 | 0 ± 0 | 0.75 ± 0.25 | 1 ± 0       | 1 ± 0       | 1 ± 0       | 1.33 ± 0.33 |
| (EIS) <sub>2</sub> -RGD6 2 + 2 + 2μl | 0 ± 0 | 0 ± 0 | 0 ± 0 | 0 ± 0       | 0.5 ± 0.29  | 0.75 ± 0.25 | 1 ± 0.41    | 1.25 ± 0.25 |
| (EIS) <sub>2</sub> -RGD6 3 + 6 + 3μl | 0 ± 0 | 0 ± 0 | 0 ± 0 | 0.5 ± 0.29  | 0.75 ± 0.25 | 1 ± 0.41    | 0.68 ± 0.33 | 0.67 ± 0.33 |
| (EIS) <sub>2</sub> -RGD6 12μl        | 0 ± 0 | 0 ± 0 | 0 ± 0 | 0 ± 0       | 0.8 ± 0.36  | 1 ± 0.5     | 1.33 ± 0.77 | 1.33 ± 0.77 |

Coordination

|                                      | 1 dpi | 5 dpi | 7 dpi | 14 dpi      | 21 dpi       | 28 dpi       | 35 dpi     | 42 dpi      |
|--------------------------------------|-------|-------|-------|-------------|--------------|--------------|------------|-------------|
| NI                                   | 0 ± 0 | 0 ± 0 | 0 ± 0 | 0.75 ± 0.48 | 1.75 ± 0.48  | 1.75 ± 0.48  | 2 ± 0.4    | 2.25 ± 0.48 |
| (EIS) <sub>2</sub> -RGD6 6μl         | 0 ± 0 | 0 ± 0 | 0 ± 0 | 0 ± 0       | 0.5 ± 0.29   | 1.33 ± 0.33  | 2 ± 0.58   | 2 ± 0.58    |
| (EIS) <sub>2</sub> -RGD6 2 + 2 + 2μl | 0 ± 0 | 0 ± 0 | 0 ± 0 | 0 ± 0       | 0.25* ± 0.25 | 1.25 ± 0.48  | 1.5 ± 0.29 | 1.5 ± 0.29  |
| (EIS) <sub>2</sub> -RGD6 3 + 6 + 3μl | 0 ± 0 | 0 ± 0 | 0 ± 0 | 0 ± 0       | 0.5* ± 0.29  | 1.5 ± 0.28   | 2 ± 0      | 2 ± 0       |
| (EIS) <sub>2</sub> -RGD6 12μl        | 0 ± 0 | 0 ± 0 | 0 ± 0 | 0.2 ± 0.09  | 0.8 ± 0.36   | 0.75 ± 0.375 | 1 ± 0.58   | 1* ± 0.58   |

Tables show the separate analysis of the individual BBB aspects assessed (paw positions, toe clearance, stepping, tail position, and coordination), at 1, 5, 7, 14, 28, and 42 days post-injury (dpi), in animals used to perform experiment (EIS)<sub>2</sub>-RGD6 I. The following comparisons were performed: (A) Non-injected (NI) group vs. PBS-injected groups (PBS 6 μL, PBS 2 + 2 + 2 μL, PBS 3 + 6 + 3 μL, or PBS 12 μL) (\*,  $p < 0.05$ ; \*\*,  $p < 0.01$ ; and \*\*\*,  $p < 0.001$  vs. NI group); (B) PBS 6 μL group vs. (EIS)<sub>2</sub>-RGD6 6 μL group (\*\*,  $p < 0.01$  vs. PBS 6 μL group); (C) PBS 2 + 2 + 2 μL vs. (EIS)<sub>2</sub>-RGD6 2 + 2 + 2 μL (\*\*\*,  $p < 0.001$  vs. PBS 2 + 2 + 2 μL); (D) PBS 3 + 6 + 3 μL vs. (EIS)<sub>2</sub>-RGD6 3 + 6 + 3 μL (\*,  $p < 0.05$ ; \*\*,  $p < 0.01$ ; and \*\*\*,  $p < 0.001$  vs. PBS 3 + 6 + 3 μL); (E), PBS 12 μL vs. (EIS)<sub>2</sub>-RGD6 12 μL (\*,  $p < 0.05$ ; \*\*,  $p < 0.01$ ; and \*\*\*,  $p < 0.001$  vs. PBS 12 μL), and (F) NI

group vs. (EIS)<sub>2</sub>-RGD6-injected groups [(EIS)<sub>2</sub>-RGD6 6  $\mu$ L, (EIS)<sub>2</sub>-RGD6 2 + 2 + 2  $\mu$ L, (EIS)<sub>2</sub>-RGD6 3 + 6 + 3  $\mu$ L or (EIS)<sub>2</sub>-RGD6 12  $\mu$ L] (\*,  $p < 0.05$ ; \*\*,  $p < 0.01$ ; and \*\*\*,  $p < 0.001$  vs. NI group). In all cases, the potential existence of statistically significant between-group differences was assessed by two-way ANOVA followed by Bonferroni post-hoc test. Please note that the combined analysis of these individual BBB aspects, in the form of BBB score and sub-score, can be found in Figures 1 and 2, respectively. In all cases, data are presented as the mean + SEM.
