# Supplementary material for: Silk-Elastin-like Polymers for Acute Intraparenchymal Treatment of the Traumatically Injured Spinal Cord: A First Systematic Experimental Approach
Source: MDPI journal article supplement (doi:10.3390/pharmaceutics14122713), 2022-12-03
Supplement: s1 [file s1]

A. PBS (all) vs. (EIS)<sub>2</sub>-RGD6 (all):

|                                | Live | Death | Total |
|--------------------------------|------|-------|-------|
| PBS (all)                      | 18   | 2     | 20    |
| (EIS) <sub>2</sub> -RGD6 (all) | 14   | 6     | 20    |
| Total                          | 20   | 20    | 40    |

B. PBS (3 + 6 + 3μl) vs. (EIS)<sub>2</sub>-RGD6 (3 + 6 + 3μl):

|                                        | Live | Death | Total |
|----------------------------------------|------|-------|-------|
| PBS (3 + 6 + 3μl)                      | 5    | 0     | 5     |
| (EIS) <sub>2</sub> -RGD6 (3 + 6 + 3μl) | 3    | 3     | 6     |
| Total                                  | 8    | 3     | 11    |

C. PBS (12μl) vs. (EIS)<sub>2</sub>-RGD6 (12μl):

|                                 | Live | Death | Total |
|---------------------------------|------|-------|-------|
| PBS (12μl)                      | 4    | 0     | 4     |
| (EIS) <sub>2</sub> -RGD6 (12μl) | 3    | 2     | 5     |
| Total                           | 7    | 2     | 9     |

D. PBS (2 + 2 + 2μl) vs. (EIS)<sub>2</sub>-RGD6 (2 + 2 + 2μl):

|                                       | Live | Death | Total |
|---------------------------------------|------|-------|-------|
| PBS (2 + 2 + 2μl)                     | 5    | 1     | 6     |
| (EIS) <sub>2</sub> -RG6 (2 + 2 + 2μl) | 4    | 0     | 4     |
| Total                                 | 9    | 1     | 10    |

E. PBS (6μl) vs. (EIS)<sub>2</sub>-RGD6 (6μl):

|                                | Live | Death | Total |
|--------------------------------|------|-------|-------|
| PBS (6μl)                      | 4    | 1     | 5     |
| (EIS) <sub>2</sub> -RGD6 (6μl) | 4    | 1     | 5     |
| Total                          | 5    | 5     | 10    |

**F. PBS (12 and 3 + 6 + 3µl) vs. (EIS)<sub>2</sub>-RGD6 (12 and 3 + 6 + 3µl):**

|                                               | Live | Death | Total |
|-----------------------------------------------|------|-------|-------|
| PBS (12 and 3 + 6 + 3µl)                      | 9    | 0     | 9     |
| (EIS) <sub>2</sub> -RGD6 (12 and 3 + 6 + 3µl) | 6    | 5*    | 11    |
| <b>Total</b>                                  | 15   | 5     | 20    |

**G. PBS (6 and 2 + 2 + 2µl) vs. (EIS)<sub>2</sub>-RGD6 (6 and 2 + 2 + 2µl):**

|                                              | Live | Death | Total |
|----------------------------------------------|------|-------|-------|
| PBS (6 and 2 + 2 + 2µl)                      | 9    | 2     | 11    |
| (EIS) <sub>2</sub> -RGD6 (6 and 2 + 2 + 2µl) | 8    | 1     | 9     |
| <b>Total</b>                                 | 17   | 3     | 20    |

Supplementary material including contingency tables corresponding to the analysis of mortality rate in animals used to perform experiment (EIS)<sub>2</sub>-RGD6 I. The following comparisons were performed: (A) All PBS-injected animals (PBS 6 µL, PBS 2 + 2 + 2 µL, PBS 3 + 6 + 3 µL, and PBS 12 µL groups) vs. all (EIS)<sub>2</sub>-RGD6-injected animals [(EIS)<sub>2</sub>-RGD6 6 µL, (EIS)<sub>2</sub>-RGD6 2 + 2 + 2 µL, (EIS)<sub>2</sub>-RGD6 3 + 6 + 3 µL, and (EIS)<sub>2</sub>-RGD6 12 µL]; (B) PBS 3 + 6 + 3 µL group vs. (EIS)<sub>2</sub>-RGD6 3 + 6 + 3 µL group; (C) PBS 12 µL group vs. (EIS)<sub>2</sub>-RGD6 12 µL group; (D) PBS 2 + 2 + 2 µL group vs. (EIS)<sub>2</sub>-RGD6 2 + 2 + 2 µL group; (E) PBS 6 µL group vs. (EIS)<sub>2</sub>-RGD6 6 µL group; (F) all animals injected with 12 µL of PBS (PBS 3 + 6 + 3 µL and PBS 12 µL groups) vs. all animals injected with 12 µL of (EIS)<sub>2</sub>-RGD6 [(EIS)<sub>2</sub>-RGD6 3 + 6 + 3 µL and (EIS)<sub>2</sub>-RGD6 12 µL groups] (\*,  $p < 0.05$ ); and (G) all animals injected with 6 µL of PBS (PBS 2 + 2 + 2 µL and PBS 6 µL groups) vs. all animals injected with 6 µL of (EIS)<sub>2</sub>-RGD6 [(EIS)<sub>2</sub>-RGD6 2 + 2 + 2 µL and (EIS)<sub>2</sub>-RGD6 6 µL groups]. In A–G, the potential existence of statistically significant between-group differences was assessed by Fisher's exact test. Please note that a graphical representation of the mortality analysis can be found in Figure 8.
