# Supplementary material for: Silk-Elastin-like Polymers for Acute Intraparenchymal Treatment of the Traumatically Injured Spinal Cord: A First Systematic Experimental Approach
Source: MDPI journal article supplement (doi:10.3390/pharmaceutics14122713), 2022-12-03
Supplement: s1 [file s1]

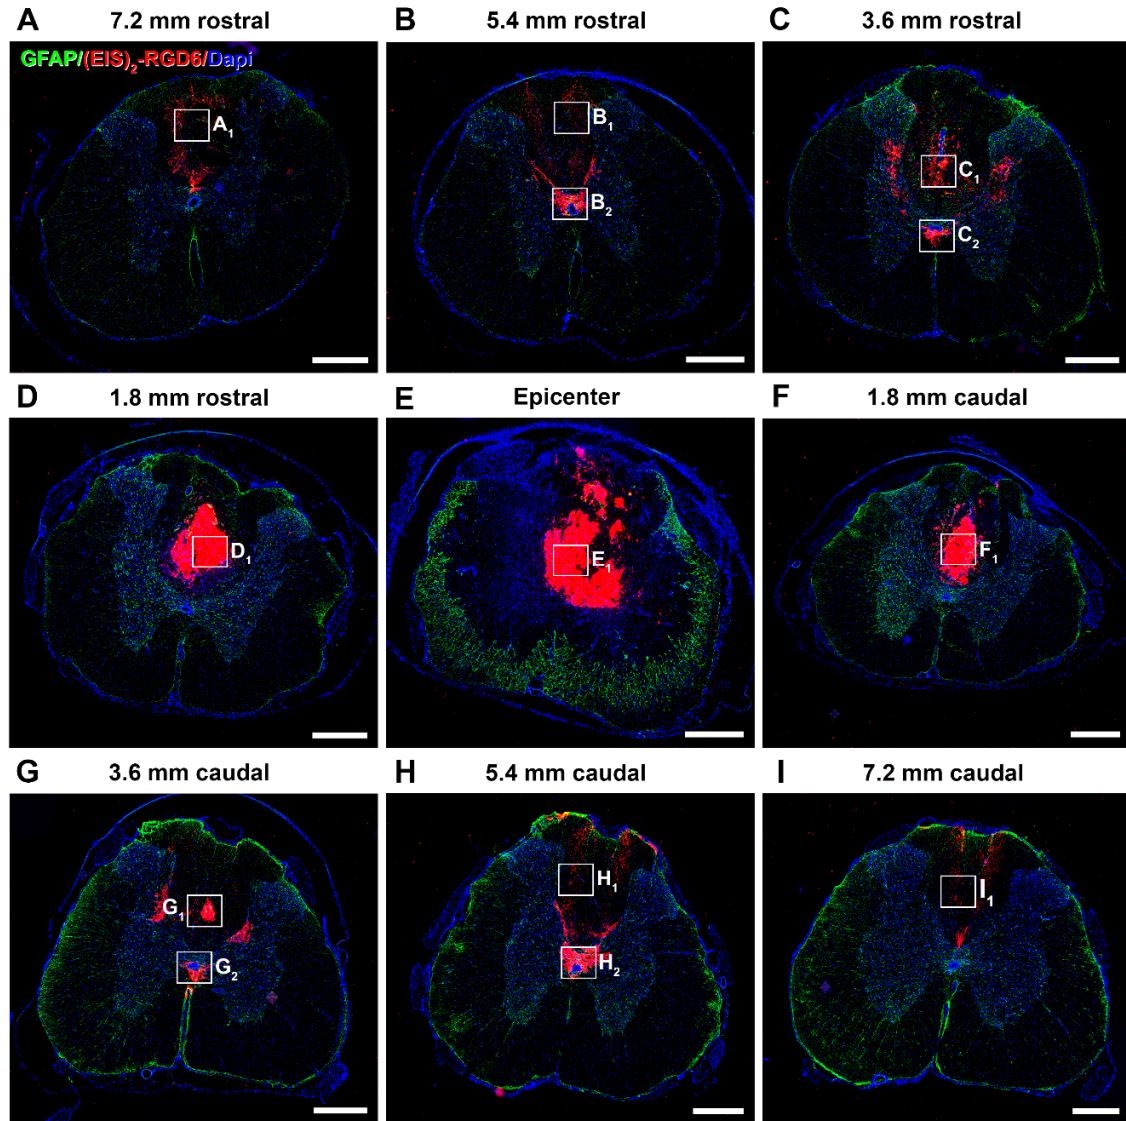

**Figure S3. Qualitative microscopic analysis of (EIS)<sub>2</sub>-RGD6 distribution at 7 days post-injury.** Representative images of whole spinal cord sections processed for the visualization of biotinylated (EIS)<sub>2</sub>-RGD6 and glial fibrillary acidic protein (GFAP) at 7 days post-injury in experiment (EIS)<sub>2</sub>-RGD6 II. The following rostro-caudal spinal cord levels are shown: (A) 7.2 mm rostral; (B) 5.4 mm rostral; (C) 3.6 mm rostral; (D) 1.8 mm rostral; (E) 0 mm; (F) 1.8 mm caudal; (G) 3.6 mm caudal; (H) 5.4 mm caudal; and (I) 7.2 mm caudal from epicentre. Scale bars, 500 μm. Please note that higher magnification images corresponding to the areas highlighted with squares in (A-I) can be found in Figure S7.
