# Supplementary material for: Silk-Elastin-like Polymers for Acute Intraparenchymal Treatment of the Traumatically Injured Spinal Cord: A First Systematic Experimental Approach
Source: MDPI journal article supplement (doi:10.3390/pharmaceutics14122713), 2022-12-03
Supplement: s1 [file s1]

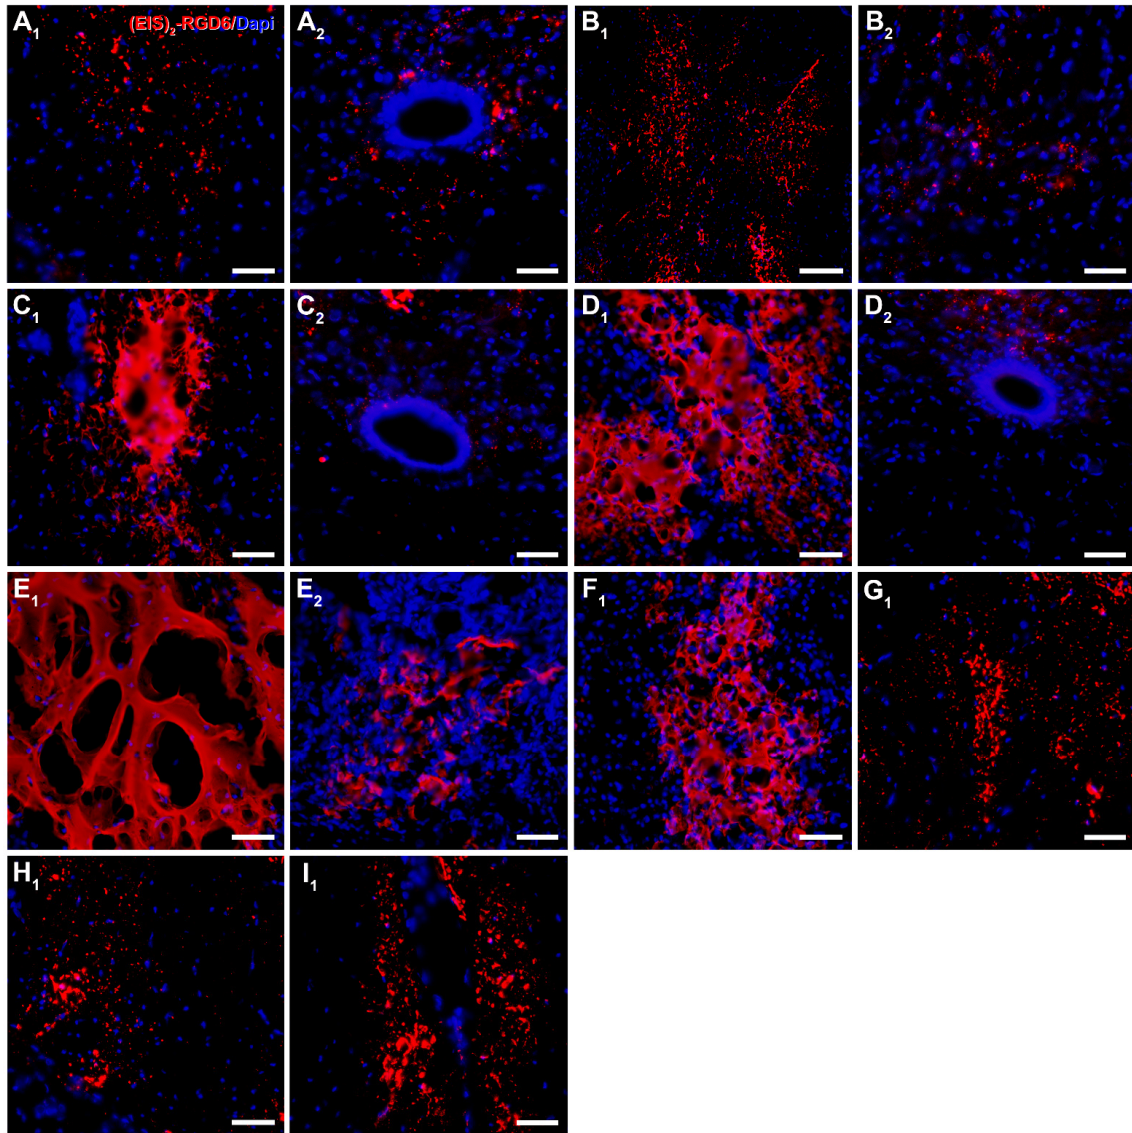

**Figure S8. Qualitative microscopic analysis of (EIS)<sub>2</sub>-RGD6 structure at 14 days post-injury.** Representative higher magnification images of spinal cord sections processed for the visualization of biotinylated (EIS)<sub>2</sub>-RGD6 at 14 days post-injury in experiment (EIS)<sub>2</sub>-RGD6 II, showing (EIS)<sub>2</sub>-RGD6 structure in the following representative rostro-caudal spinal cord levels: (A1, A2) 7.2 mm rostral; (B1, B2) 5.4 mm rostral; (C1, C2) 3.6 mm rostral; (D1, D2) 1.8 mm rostral; (E1, E2) 0 mm; (F1) 1.8 mm caudal; (G1) 3.6 mm caudal; (H1) 5.4 mm caudal; and (I1) 7.2 mm caudal from the injury epicentre. Scale bars, 50  $\mu$ m. Please note that the specific areas shown in these images are highlighted in Figure S4.
